# Supplementary material for: Gas phase vibrational spectroscopy of mass-selected vanadium oxide anions
Source: Royal Society of Chemistry journal article supplement (doi:10.1039/b803492c), 2008-01-01
Supplement: b803492c.pdf [file b803492c.pdf]

## Supplementary material:

### Gas Phase Vibrational Spectroscopy of Mass-Selected Vanadium Oxide Anions

G. Santambrogio, M. Brümmer, L. Wöste, J. Döbler, M. Sierka, J. Sauer, G. Meijer, K.R. Asmis

**Table S1:** Total B3LYP/TZVP energies (in Hartree).

|                                                          | <u>reference species</u>                    |              |                       |
|----------------------------------------------------------|---------------------------------------------|--------------|-----------------------|
| O <sub>2</sub>                                           |                                             | -150.32213   |                       |
| O                                                        |                                             | -75.06560    |                       |
| VO <sub>2</sub>                                          |                                             | -1094.37901  |                       |
| VO <sub>2</sub> <sup>-</sup>                             |                                             | -1094.41670  |                       |
| VO <sub>3</sub>                                          | <sup>2</sup> A''                            | -1169.58586  |                       |
| VO <sub>3</sub> <sup>-</sup>                             | <sup>1</sup> A'                             | -1169.73552  |                       |
| V <sub>2</sub> O <sub>4</sub> <sup>-</sup>               | C <sub>2v</sub> <sup>4</sup> A <sub>2</sub> | -2189.01801  |                       |
| V <sub>2</sub> O <sub>5</sub>                            |                                             | -2264.15692  |                       |
| V <sub>2</sub> O <sub>5</sub> <sup>-</sup>               | C <sub>s</sub> <sup>2</sup> A'              | -2264.304568 |                       |
| V <sub>3</sub> O <sub>7</sub> <sup>-</sup>               | C <sub>2v</sub> <sup>3</sup> A <sub>2</sub> | -3358.85683  |                       |
| V <sub>3</sub> O <sub>8</sub>                            | C <sub>2v</sub> <sup>2</sup> B <sub>2</sub> | -3433.91990  |                       |
| V <sub>4</sub> O <sub>9</sub> <sup>-</sup> tetra         | C <sub>s</sub> <sup>4</sup> A''             | -4453.42836  |                       |
| V <sub>4</sub> O <sub>10</sub>                           |                                             | -4528.553928 |                       |
|                                                          | <u>optimized anions</u>                     |              | <u>neutral//anion</u> |
| V <sub>2</sub> O <sub>6</sub> <sup>-</sup>               | C <sub>2v</sub> <sup>2</sup> B <sub>2</sub> | -2339.51460  | -2339.30530           |
| V <sub>2</sub> O <sub>7</sub> <sup>-</sup> Superoxo      | C <sub>s</sub> <sup>2</sup> A''             | -2414.69233  | -2414.48824           |
| V <sub>3</sub> O <sub>8</sub> <sup>-</sup> RING          | C <sub>2v</sub> <sup>1</sup> A <sub>1</sub> | -3434.12579  | -3433.90236           |
| V <sub>4</sub> O <sub>10</sub> <sup>-</sup> Tetra        | D <sub>2d</sub> <sup>2</sup> B <sub>1</sub> | -4528.71582  | -4528.55090           |
| V <sub>4</sub> O <sub>11</sub> <sup>-</sup> dioxo-bridge | C <sub>s</sub>                              | -4603.85693  | -4603.61234           |
| V <sub>5</sub> O <sub>13</sub> <sup>-</sup> pyramidal    | C <sub>4v</sub> <sup>1</sup> A <sub>1</sub> | -5698.48186  |                       |
| V <sub>6</sub> O <sub>15</sub> <sup>-</sup> cage         | C <sub>s</sub> <sup>2</sup> A'              | -6793.05053  | -6792.85637           |
| V <sub>7</sub> O <sub>18</sub> <sup>-</sup> pyramidal    | C <sub>2v</sub> <sup>1</sup> A <sub>1</sub> | -7962.81976  |                       |
| V <sub>8</sub> O <sub>20</sub> <sup>-</sup> cage         | C <sub>s</sub> a''                          | -9057.38660  | -9057.18532           |

**Table S2:** Scaled harmonic vibrational frequencies (in  $\text{cm}^{-1}$ ) above  $550 \text{ cm}^{-1}$  (and V-O• mode), relative intensities (in parentheses) and mode assignment for additional isomers of vanadium oxide anions from B3LYP/TZVP calculations. Scaling factors of 0.9167 (V=O modes) and 0.9832 (V-O-V modes) were taken from K. R. Asmis, G. Meijer, M. Brümmer, C. Kaposta, G. Santambrogio, L. Wöste and J. Sauer, J. Chem. Phys., 2004, 120, 6461.

| Anion                                                                               | Symmetry                  | Type           | Scaled Harmonic Frequency ( $\text{cm}^{-1}$ )                                                                                                                                                                                                                            |
|-------------------------------------------------------------------------------------|---------------------------|----------------|---------------------------------------------------------------------------------------------------------------------------------------------------------------------------------------------------------------------------------------------------------------------------|
| $\text{V}_4\text{O}_{11}^-$<br>$\mu\text{-}\eta^2\text{:}\eta^2\text{-peroxo}$      | ${}^2\text{A}' (C_s)$     | V=O            | 1002 (a', 0.07), 984 (a', 0.88), 972 (a', 0.78) ,<br>966 (a'', 1.00)                                                                                                                                                                                                      |
|                                                                                     |                           | O-O<br>V-O-V   | 853 <sup>a</sup> (a', 0.06)<br>811 (a'', 0.43), 806 (a', 0.66), 739 (a', 0.60),<br>701 (a'', 0.38), 635 (a', 0.08), 616 (a'', 0.07) ,<br>594 (a', 0.06)                                                                                                                   |
| $\text{V}_4\text{O}_{11}^-$<br>$\mu\text{-}\eta^2\text{:}\eta^2\text{-peroxoanion}$ | ${}^2\text{B}_2 (C_{2v})$ | V=O            | 1009 (a <sub>1</sub> , 0.07), 990 (b <sub>1</sub> , 0.84), 979 (a <sub>1</sub> , 0.78),<br>971 (b <sub>2</sub> , 1.00)                                                                                                                                                    |
|                                                                                     |                           | O...O<br>O-V-O | 640 <sup>a</sup> (a <sub>1</sub> , 0.07)<br>822 (a <sub>1</sub> , 0.91), 807 (b <sub>2</sub> , 0.59), 756 (b <sub>1</sub> , 0.63),<br>658 (a <sub>2</sub> , 0.00), 639 (a <sub>1</sub> , 0.02), 614 (b <sub>2</sub> , 0.13), 585<br>(b <sub>1</sub> , 0.01)               |
| $\text{V}_4\text{O}_{11}^-$<br>dioxo-open                                           | ${}^2\text{A}' (C_s)$     | V=O            | 989 (a', 0.11), 975 (a'', 0.34), 950 (a', 0.20),<br>947 (a', 0.11), 849 (a', 0.17)                                                                                                                                                                                        |
|                                                                                     |                           | V-O•<br>O-V-O  | 424 (a', 0.00)<br>885 (a', 0.38), 867 (a'', 0.27), 837 (a', 1.00),<br>722 (a'', 0.16), 627 (a', 0.04), 619 (a'', 0.00)                                                                                                                                                    |
| $\text{V}_5\text{O}_{13}^-$<br>bridged                                              | ${}^1\text{A}_1 (C_{2v})$ | V=O            | 1002 (a <sub>1</sub> , 0.09), 982 (b <sub>1</sub> , 0.46), 980 (a <sub>1</sub> , 0.09),<br>980 (b, 0.57), 950 (a <sub>1</sub> , 0.03), 949 (b <sub>1</sub> , 0.24)                                                                                                        |
|                                                                                     |                           | O-V-O          | 932 (a <sub>1</sub> , 0.77), 915 (b <sub>2</sub> , 0.74), 871 (a <sub>1</sub> , 1.00),<br>850 (b <sub>1</sub> , 0.42), 718 (b <sub>2</sub> , 0.29), 644 (a <sub>2</sub> , 0.00),<br>635 (a <sub>1</sub> , 0.03), 587(b <sub>1</sub> , 0.11) , 585 (b <sub>2</sub> , 0.00) |
| $\text{V}_7\text{O}_{18}^-$<br>bridged                                              | ${}^1\text{A}' (C_s)$     | V=O            | 1008 (a', 0.03), 991 (a', 0.17), 988 (a'', 0.21),<br>988 (a', 0.14), 982 (a', 0.00), 981 (a'', 0.03) ,<br>955 (a', 0.01) , 951 (a', 0.10)                                                                                                                                 |
|                                                                                     |                           | V-O-V          | 960 (a', 0.04), 955 (a'', 0.30), 938 (a', 0.29),<br>913 (a', 1.00), 909 (a'', 0.32), 890 (a', 0.51),<br>746 (a'', 0.12), 650 (a'', 0.00), 620 (a', 0.01),<br>605 (a'', 0.01), 592 (a', 0.01), 567 (a', 0.01)                                                              |

<sup>a</sup> Scaling factor for V=O modes applied.

**Table S3:** DFT energy  $V_{\text{pot}}$  (in mHartree) as a function of the difference of the two V-O distances in the V-O-V bridge,  $q = R(\text{O-V}_1) - R(\text{O-V}_2)$  (in Bohr), which corresponds to the normal coordinate of the saddle point and minimum structures.

| $q$      | $V_{\text{pot}}$ |
|----------|------------------|
| 0.0      | 3.7397           |
| 0.04811  | 3.3458           |
| 0.08051  | 2.9457           |
| 0.18355  | 0.3887           |
| 0.23464  | 0.0930           |
| 0.25444  | 0.0307           |
| 0.28124  | 0.0000           |
| 0.30802  | 0.0312           |
| 0.32785  | 0.0960           |
| 0.35513  | 0.2446           |
| 0.37766  | 0.4204           |
| 0.38885  | 0.5260           |
| 0.44262  | 1.2140           |
| 0.46248  | 1.5450           |
| 0.51977  | 2.7604           |
| 0.55307  | 3.6466           |
| 0.598110 | 5.0819           |
| 0.631100 | 6.3075           |
| 0.668440 | 7.8547           |
| 0.695790 | 9.1140           |
| 0.722610 | 10.4570          |

## Parameters for the Quartic and Manning Potentials Derived from DFT results

Table S4 shows the DFT results of the harmonic frequency,  $\omega(q_0)$ , at the energy minimum  $C_s$  structures,  $q_0 = R_0(\text{O}-V_1) - R_0(\text{O}-V_2)$  for this structure, and the barrier  $V_b$ , the energy difference between the  $C_{2v}$  and  $C_s$  structures.

The harmonic and quartic force constants  $F$  and  $Q$  we get from the barrier height  $V_b$  and the position of the minima  $q_0$ ,

$$F = 4 \frac{V_b}{q_0^2} \quad Q = 24 \frac{V_b}{q_0^4}.$$

We get the parameters for the Manning potential,

$$a \equiv \frac{A}{2Mr^2}, \quad d \equiv \frac{D}{2Mr^2}$$

from  $V_b$  and an assumed  $U_d = 12,000 \text{ cm}^{-1}$ ,

$$a + d = -2U_d + 2\sqrt{-U_d V_b}; \quad d = -(U_d - V_b) + 2\sqrt{-U_d V_b}$$

and we get  $2r$  from  $a$  and  $d$  with  $q_0$

$$\frac{q_0}{2r} = \ln \left( \sqrt{\frac{2d}{a+d}} - 1 + \sqrt{\frac{2d}{a+d}} \right)$$

**Table S4:** DFT results for the minimum and saddle point structures as well as potential parameters of the quartic and Manning-type potentials for  $V_6O_{15}^-$  and  $V_8O_{20}^-$ .

| DFT results                              | $V_8O_{20}^-$          |                      | $V_6O_{15}^-$          |                      |
|------------------------------------------|------------------------|----------------------|------------------------|----------------------|
| $\omega(q_0) / \text{cm}^{-1}$           | 878 (864) <sup>a</sup> |                      | 931 (915) <sup>a</sup> |                      |
| $V_b / \text{mHartree} (\text{cm}^{-1})$ | 3.32036 (729)          |                      | 3.73966 (821)          |                      |
| $q_0 / \text{Bohr}$                      | 0.339023               |                      | 0.281240               |                      |
| Parameters                               | Quartic                | Manning <sup>b</sup> | Quartic                | Manning <sup>b</sup> |
| $-F/2 / \text{mHartree}$                 | -57.77725              |                      | -94.56005              |                      |
| $Q/24 / \text{mHartree}$                 | 251.34404              |                      | 597.75543              |                      |
| $a+d / \text{mHartree}$                  |                        | 136.29970            |                        | 137.95062            |
| $d / \text{mHartree}$                    |                        | 84.94404             |                        | 87.01426             |
| $2r / \text{Bohr}$                       |                        | 0.70924538           |                        | 0.57234389           |

<sup>a</sup> Scaled harmonic frequency.

<sup>b</sup>  $U_d = 54.676 \text{ mHartree} (=12000 \text{ cm}^{-1})$

**Figure S1:** Eigenvalues (horizontal lines) and eigenfunctions  $\chi_i$  (ungerade wavefunctions are represented by dashed lines for better visibility) of the double-well potential connecting two equivalent  $C_s$  minima via a  $C_{2v}$  saddle point in  $V_6O_{15}^-$ . The potential energy was approximated by a 16<sup>th</sup>-degree polynomial function, which was fit to 21 points (see Table 3 of the supplementary material) calculated along the normal coordinate  $q$  of the relaxed DFT potential energy curve.

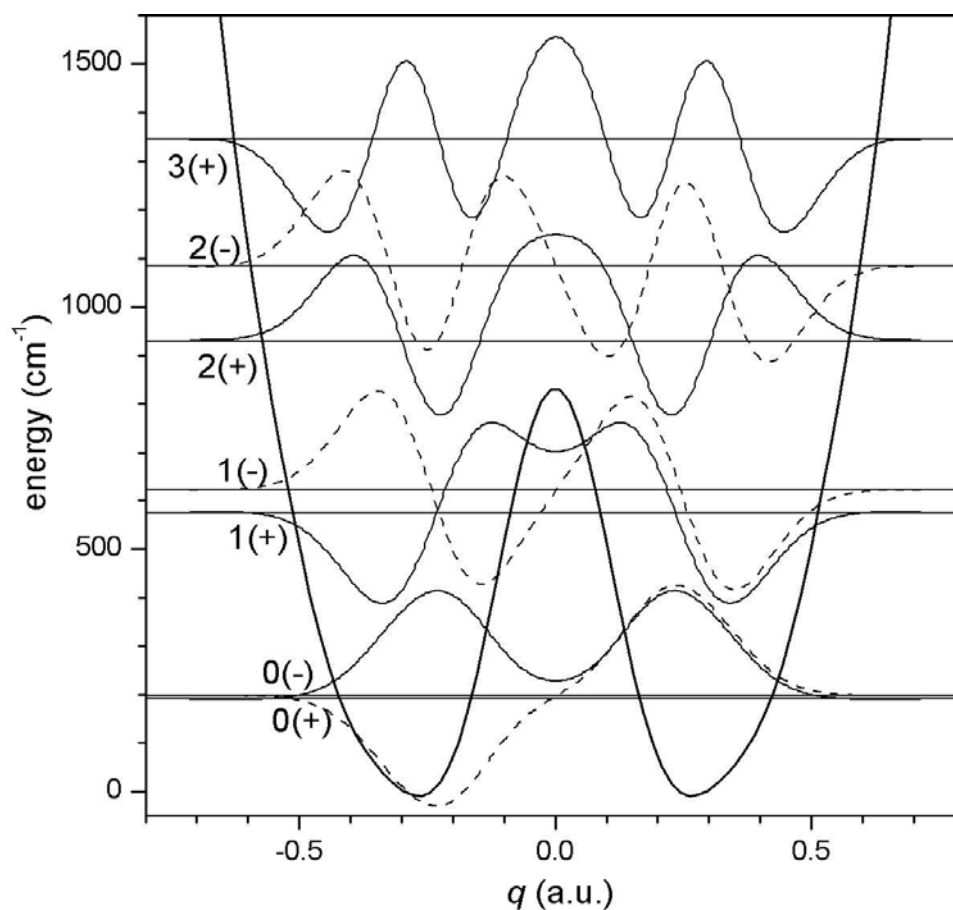

Relative transitions intensities  $I_{ik}$  in Table S4 of the manuscript were approximated within the linear dipole approximation by calculating the square of the transition matrix elements  $\mathbf{M}_{ik}$ :

$$I_{ik} \propto \mathbf{M}_{ik}^2 = \langle \chi_i | q | \chi_k \rangle^2 .$$
